# Supplementary material for: Heterosis Is Prevalent Among Domesticated but not Wild Strains of Saccharomyces cerevisiae
Source: PubMed Central journal article supplement (PMC3931565; doi:10.1534/g3.113.009381), 2013-12-16
Supplement: supp_g3.113.009381_FigureS1.pdf [file supp_g3.113.009381_FigureS1.pdf]

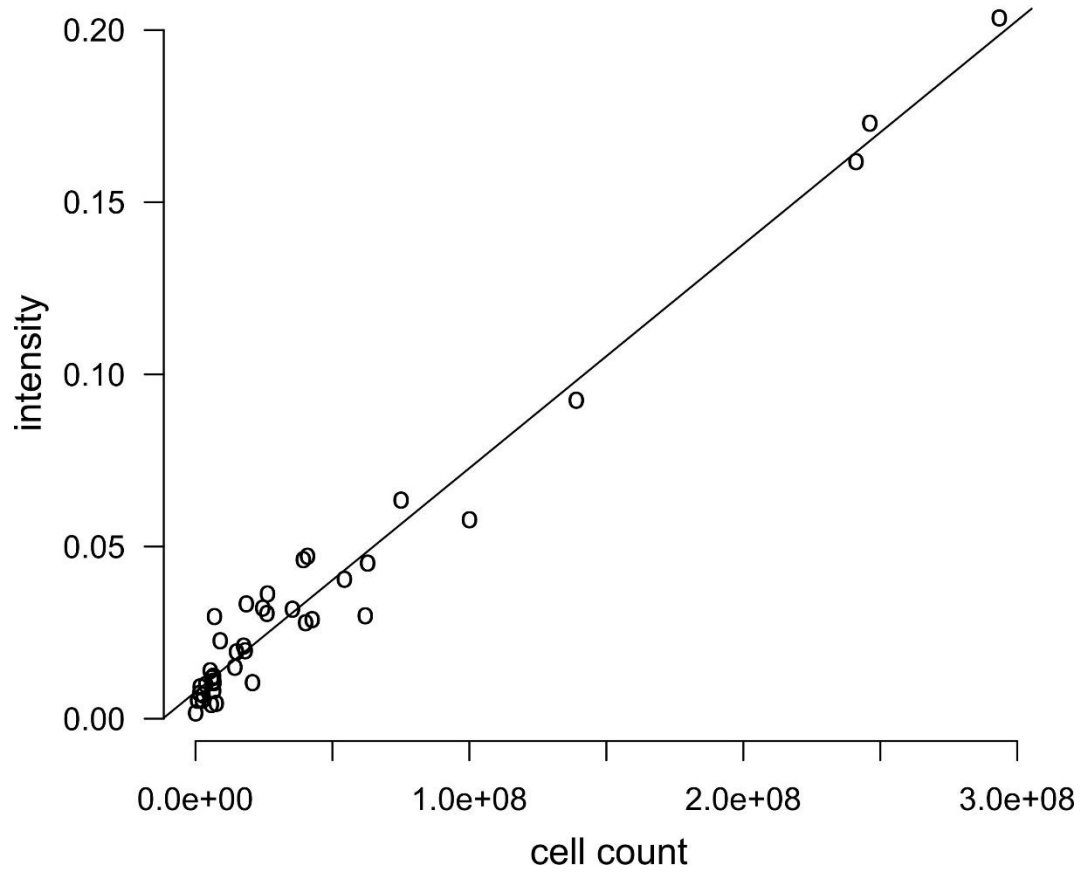

**Figure S1** Correlation between the “intensity” scores of Colonyzer 2.0 and the cell counts (see Methods).
